# Supplementary material for: Is the Assisted Enrichment efficient to the recovery of the Tropical Semi-deciduous Forests?
Source: Research Square preprint supplement (doi:10.21203/rs.3.rs-8501525/v1), 2026-01-14
Supplement: Supplementary file 1 [file 5d3063866fa19c27cb96a8ec.docx]

**SUPLEMENTARY MATERIAL**

**Figura S1** Meteorological relationship for the sample regions. The bars represent the monthly rainfall of each area and the lines represent the average monthly temperature of each area. The initials **T** and **P** represent, respectively, the Temperature and Rainfall data.

Sourse: EMBRAPA 2023.

**Table 1** List of species used in the study. In the table: **Species** - referred species worked on; **Name** - popular name of the species; **LF** - life form of the species; Occurrence - Brazilian regions of natural occurrence of the species; **Characteristics** - main characteristics described of the species; **SC** - Successional class of the species, with NP - non-pioneer and P - pioneers; **DS** - Dispersal Syndrome of the species, with AUT autochoric and ZOO - zoochoric; **FG** - Funtional Group of the species, with D - diversity and P – filling.ea

| Species ¹ | Popular Name ² | FV³ | Occurrence ¹ | Characteristics ² | SC³ | DS³ | FG³ | A⁴ |
| --- | --- | --- | --- | --- | --- | --- | --- | --- |
| *Astronium urundeuva* (M.Allemão) Engl. | Aroeira-preta;  Aroeira verdadeira | Tree | North, Northeast, Midwest, Southeast and South | Deciduous, heliophilous, selective xerophytic plant, characteristic of dry and rocky terrains. It is 6-14m tall in the cerrado and caatinga, and up to 20-25m in more fertile soils of the semi-deciduous broadleaf forest. It is suitable for general afforestation. | NP | AUT | D | LC |
| *Eugenia uniflora* L. | Pitangueira; Pitanga | Tree | Northeast, Midwest, Southeast and South | Planta semidecídua, heliófita, seletiva higrófita, muito frequente em solos úmidos de regiões acima de 700 m de altitude. Possui altura de 6-12 m. É uma árvore ornamental, podendo ser utilizada no paisagismo. Recomenda-se seu plantio em reflorestamentos heterogêneos. | NP | ZOO | D | LC |
| *Hymenaea courbaril* L. | Jatobá; Jatobá-da-mata | Tree | North, Northeast, Midwest, Southeast and South | Semi-deciduous plant, heliophyte or sciophyte, characteristic of the semi-deciduous broadleaf forest. It has a height of 6-12 m, with a twisted trunk of 30-50 cm in diameter. A tree suitable for the composition of reforestation and urban landscaping. | NP | ZOO | D | DD |

Sourse: ¹ Flora do Brasil 2024, ² Barbosa et al.2017, ³ Lorenzi 1992.

**Table S2** Phytosociological parameters used as a basis for characterizing the vegetation. In the parameters, **NI – F** and **NI – P** consist of the number of individuals of the species present in FAECA and PNGD, respectively; **RelDe – F** and **RelDe – P** the relative density of FAECA and PNGD, respectively**; RelFr – F** and **RelFr – P** the relative frequency of the species of FAECA and PNGD, respectively; **RelDo – F** and **RelDo – P** the relative dominance of the species in FAECA and PNGD, respectively.

| Family | Species | NI-F | NI-P | RelDe-F | RelDe-P | RelFr-F | RelFr-P | RelDo-F | RelDo-P |
| --- | --- | --- | --- | --- | --- | --- | --- | --- | --- |
| Acacardiaceae | *Astronium graveolens* Jacq. | 1 | - | 0,26 | - | 0,52 | - | 0,73 | - |
| *Tapirira guianensis* Aubl. | 14 | 8 | 3,64 | 2,19 | 4,69 | 3,4 | 9,74 | 2,94 |
| Annonaceae | *Unonopsis guatterioides* (A.DC.) R.E.Fr. | 1 | 3 | 0,26 | 0,82 | 0,52 | 0,85 | 0 | 0,37 |
| Apocynaceae | *Aspidosperma polyneuron* Müll.Arg. | 5 | - | 1,3 | - | 2,08 | - | 0,96 | - |
| Aspidosperma sp. | - | 7 | - | 1,91 | - | 2,98 | - | 0,79 |
| Tabernaemontana sp. | - | 2 | - | 0,55 | - | 0,85 | - | 0,23 |
| Araliaceae | *Dendropanax cuneatus* (DC.) Decne. & Planch. | 1 | - | 0,26 | - | 0,52 | - | 0,03 | - |
| *Didymopanax morototoni* (Aubl.) Decne. & Planch. | 34 | 13 | 8,83 | 3,55 | 4,69 | 3,83 | 14,71 | 16,86 |
| Arecaceae | *Syagrus romanzoffiana* (Cham.) Glassman | 13 | - | 3,38 | - | 4,69 | - | 3,79 | - |
| Bignoniaceae | *Handroanthus impetiginosus* (Mart. ex DC.) Mattos | - | 3 | - | 0,82 | - | 1,28 | - | 3,8 |
| *Cordia sellowiana* Cham. | 28 | - | 7,27 | - | 6,25 | - | 2,43 | - |
| *Cordia ecalyculata* Vell. | 1 | 3 | 0,26 | 0,82 | 0,52 | 0,85 | 0,03 | 0,05 |
| Burseraceae | *Protium heptaphyllum* (Aubl.) Marchand | - | 18 | - | 4,92 | - | 5,53 | - | 5,39 |
| Cannabaceae | *Celtis iguanaea* (Jacq.) Sarg. | 9 | 1 | 2,34 | 0,27 | 3,65 | 0,43 | 0,9 | 0,13 |
| Ebenaceae | *Diospyros inconstans Jacq.* | 2 | - | 0,52 | - | 1,04 | - | 0 | - |
| Euphorbiaceae | *Actinostemon concepcionis* (Chodat & Hassl.) Hochr. | - | 2 | - | 0,55 | - | 0,85 | - | 0,05 |
| *Actinostemon concolor* (Spreng.) Müll.Arg. | 1 | 15 | 0,26 | 4,1 | 0,52 | 4,26 | 0,01 | 0,39 |
| *Croton floribundus* Spreng. | - | 7 | - | 1,91 | - | 1,28 | - | 2,65 |
| *Croton urucurana* Baill. | 4 | - | 1,04 | - | 1,56 | - | 0,05 | - |
| *Sapium haematospermum* Müll.Arg. | 1 | - | 0,26 | - | 0,52 | - | 0,01 | - |
| Fabaceae | *Copaifera langsdorffii* Desf. | 12 | 3 | 3,12 | 0,82 | 3,13 | 1,28 | 0,7 | 0,29 |
| *Holocalyx balansae* Micheli | - | 8 | - | 2,19 | - | 2,98 | - | 0,59 |
| *Hymenaea courbaril* L. | - | 2 | - | 0,55 | - | 0,85 | - | 3,18 |
| *Inga marginata* Willd. | - | 1 | - | 0,27 | - | 0,43 | - | 0 |
| *Inga vera* Wildt. | 5 | - | 1,3 | - | 2,08 | - | 0,4 | - |
| *Machaerium acutifolium* Vogel | - | 4 | - | 1,09 | - | 1,28 | - | 0,45 |
| *Parapiptadenia rigida* (Benth.) Brenan | 4 | - | 1,04 | - | 1,56 | - | 0,32 | - |
| *Senegalia polyphylla* (DC.) Britton & Rose | - | 7 | - | 1,91 | - | 2,13 | - | 1,52 |

| Family | Species | NI-F | NI-P | RelDe-F | RelDe-P | RelFr-F | RelFr-P | RelDo-F | RelDo-P |
| --- | --- | --- | --- | --- | --- | --- | --- | --- | --- |
| Lacistemataceae | *Lacistema hasslerianum* Chodat | 2 | 1 | 0,52 | 0,27 | 1,04 | 0,43 | 0,27 | 0,02 |
| Lamiaceae | *Aegiphila integrifolia* (Jacq.) Moldenke | - | 2 | - | 0,55 | - | 0,85 | - | 0,67 |
| Lauraceae | *Nectandra angustifolia* (Schrad.) Nees & Mart. | - | 2 | - | 0,55 | - | 0,85 | - | 0,27 |
| *Nectandra megapotamica* (Spreng.) Mez | 42 | 30 | 10,91 | 8,2 | 6,77 | 5,96 | 4,74 | 28,2 |
| Lecythidaceae | *Cariniana estrellensis* (Raddi) Kuntze | - | 3 | - | 0,82 | - | 1,28 | - | 0,02 |
| Malvaceae | *Guazuma ulmifolia* Lam. | 4 | - | 1,04 | - | 1,56 | - | 1,3 | - |
| *Luehea divaricata* Mart. | - | 5 | - | 1,37 | - | 1,28 | - | 0,6 |
| Meliaceae | *Cabralea canjerana* (Vell.) Mart. | 1 | - | 0,26 | - | 0,52 | - | 0,81 | - |
| *Cedrela fissilis* Vell. | 8 | 1 | 2,08 | 0,27 | 1,56 | 0,43 | 0,39 | 0,02 |
| *Guarea* *macrophylla* Vahl | 1 | 7 | 0,26 | 1,91 | 0,52 | 2,13 | 0,01 | 0,22 |
| *Trichilia elegans* A.Juss. | 1 | 2 | 0,26 | 0,55 | 0,52 | 0,43 | 0,07 | 0,01 |
| *Trichilia pallida* Sw. | - | 14 | - | 3,83 | - | 3,83 | - | 1,64 |
| Moraceae | *Ficus guaranitica* Chodat | 4 | 2 | 1,04 | 0,55 | 1,56 | 0,85 | 1,67 | 0,44 |
| *Ficus insipida* Willd. | 2 | - | 0,52 | - | 1,04 | - | 0,03 | - |
| *Maclura tinctoria* (L.) D.Don ex Steud. | 2 | 4 | 0,52 | 1,09 | 1,04 | 1,28 | 1,84 | 1,3 |
| Myrtaceae | *Eugenia paracatuana* O.Berg | 17 | - | 4,42 | - | 3,13 | - | 37,49 | - |
| *Eugenia uniflora* L. | 3 | - | 0,78 | - | 1,56 | - | 0,86 | - |
| *Myrcia glomerata* (Cambess.) G.P.Burton & E.Lucas | - | 1 | - | 0,27 | - | 0,43 | - | 0,06 |
| *Myroxylon peruiferum* L.f. | - | 6 | - | 1,64 | - | 2,13 | - | 0,6 |
| Myrtaceae 1 | 1 | - | 0,26 | - | 0,52 | - | 0,02 | - |
| Myrtaceae 2 | - | 11 | - | 3,01 | - | 2,98 | - | 1,18 |
| Myrtaceae 3 | - | 1 | - | 0,27 | - | 0,43 | - | 0,06 |
| Nyctaginaceae | *Guapira opposita* (Vell.) Reitz | - | 12 | - | 3,28 | - | 3,83 | - | 1,16 |
| Opiliaceae | *Agonandra brasiliensis* Miers ex Benth. & Hook.f. | - | 11 | - | 3,01 | - | 2,13 | - | 3,83 |
| Piperaceae | *Piper amalogo* L. | - | 3 | - | 0,82 | - | 1,28 | - | 0,17 |
| *Piper arboreum* Aubl. | - | 9 | - | 2,46 | - | 2,98 | - | 1,64 |
| *Piper hispidum* Sw. | 11 | - | 2,86 | - | 2,6 | - | 0,38 | - |
| Primulaceae | *Clavija nutans* (Vell.) B.Ståhl | - | 1 | - | 0,27 | - | 0,43 | - | 0 |
| Rhamnaceae | *Rhamnidium elaeocarpum* Reissek | 2 | 1 | 0,52 | 0,27 | 0,52 | 0,43 | 0,1 | 0,17 |
| Rubiaceae | *Chomelia obtusa* Cham. & Schltdl. | 3 | - | 0,78 | - | 1,56 | - | 0,01 | - |
| *Coussarea hydrangeifolia* (Benth.) Müll.Arg. | - | 6 | - | 1,64 | - | 2,55 | - | 1,24 |
| *Psychotria carthagenensis* Jacq. | 4 | - | 1,04 | - | 1,04 | - | 0,4 | - |
| Rutaceae | *Helietta apiculata* Benth. | 1 | 7 | 0,26 | 1,91 | 0,52 | 2,13 | 0,03 | 2,37 |
| *Zanthoxylum rhoifolium* Lam. | 1 | 1 | 0,26 | 0,27 | 0,52 | 0,43 | 0,01 | 0,08 |
| *Matayba inelegans* Spruce ex Radlk. | 3 | - | 0,78 | - | 1,04 | - | 0,55 | - |

| Family | Species | NI-F | NI-P | RelDe-F | RelDe-P | RelFr-F | RelFr-P | RelDo-F | RelDo-P |
| --- | --- | --- | --- | --- | --- | --- | --- | --- | --- |
| Salicaceae | *Banara arguta* Briq. | 1 | - | 0,26 | - | 0,52 | - | 0,03 | - |
| *Casearia decandra* Jacq. | 23 | 13 | 5,97 | 3,55 | 6,25 | 4,26 | 1,03 | 0,75 |
| *Casearia gossypiosperma* Briq. | 4 | 2 | 1,04 | 0,55 | 2,08 | 0,85 | 0,05 | 0,25 |
| Sapindaceae | *Allophylus edulis* (A.St.-Hil. et al.) Hieron. ex Niederl. | 8 | - | 2,08 | - | 2,6 | - | 0,64 | - |
| *Averrhoidium paraguaiense* Radlk. | 15 | 5 | 3,9 | 1,37 | 4,17 | 1,28 | 2,58 | 0,81 |
| *Cupania tenuivalvis* Radlk. | 46 | - | 11,95 | - | 6,25 | - | 6,01 | - |
| *Matayba elaeagnoides* Radlk. | 28 | - | 7,27 | - | 6,77 | - | 2,85 | - |
| *Matayba guianensis* Aubl. | - | 9 | - | 2,46 | - | 2,55 | - | 1,11 |
| *Matayba inelegans* Spruce ex Radlk. | 3 | - | 0,78 | - | 1,04 | - | 0,55 | - |
| Sapotaceae | *Chrysophyllum gonocarpum* (Mart. & Eichler ex Miq.) Engl. | - | 25 | - | 6,83 | - | 3,83 | - | 3,46 |
| *Chrysophyllum marginatum* (Hook. & Arn.) Radlk. | 4 | 13 | 1,04 | 3,55 | 1,04 | 2,98 | 0,01 | 3,55 |
| Siparunaceae | *Siparuna guianensis* Aubl. | - | 48 | - | 13,11 | - | 6,81 | - | 3,89 |
| Urticaceae | *Cecropia pachystachya* Trécul | 7 | 1 | 1,82 | 0,27 | 2,6 | 0,43 | 1,02 | 0,52 |

**Table S3** Average values ​​referring to the parameters of the environmental variables of the sample areas. In the data, **TEM** is the average temperature (°C), **HUM** the average relative humidity (%), **LIG** the average light intensity (20000 [x10]), **SER** the average depth of litter (cm), **ARB** the average basal area of ​​the sampled areas (m²/ha) and **DEN** the relative density of species (%).

| AREA | TECHNIQUE | PARAMETERS | | | | | |
| --- | --- | --- | --- | --- | --- | --- | --- |
| **TEM** | **HUM** | **LIG** | **SER** | **ARB** | **DEN** |
| PNGD | **Planting seedlings** | 30,2 | 80,7 | 45,521 | 4,6 | 2,043 | 4,918 |
| **Direct seeding** | 30,4 | 82,3 | 14,946 | 4,6 | 1,92 | 5,081 |
| FAECA | **Planting seedlings** | 31,3 | 79,2 | 258,9 | 3,8 | 6,878 | 5,143 |
| **Direct seeding** | 31,4 | 77,4 | 187,1 | 4,2 | 4,078 | 4,858 |

**Table S4** Data referring to the averages of the parameters evaluated in the soil and litter quality in both sampling areas. Materials analyzed by the company SOLO FÉRTIL – Análises Agrícolas. In the table, **R** – Repetitions, **Macro** - macronutrients; **Micro** - micronutrients, **pH** - soil hydrogen potential, **OM** - organic matter, **N** - Nitrogen, **P** - phosphorus, **K** - potassium, **Ca** - calcium, **Mg** - magnesium and **S** - sulfur.

| PARAMETERS | | | AREA | | | |
| --- | --- | --- | --- | --- | --- | --- |
| **FAECA** | | **PNGD** | |
| **1** | **2** | **1** | **2** |
| SOIL |  | pH H₂O | 5,8 | 6,4 | 4,2 | 3,8 |
| M.O (g/dm³) | 60 | 76,3 | 15,8 | 10,2 |
| Macro | P (Mehlich-1) | 2,5 | 2,2 | 1,9 | 1 |
| K (mmolc/dm³) | 9,6 | 14 | 1,4 | 0,5 |
| Micro | Ca (mmolc/dm³) | 88,8 | 133,5 | 8,4 | 4,8 |
| S (mg/dm³) | 4 | 2,8 | 4,3 | 2,6 |
| Fisic | Silte (%) | 17,5 | 17,9 | 3,8 | 3,4 |
| Areia (%) | 18,8 | 19,6 | 83,7 | 84,1 |
| Argila (%) | 63,8 | 62,5 | 12,5 | 12,5 |
| SHRUB-TREES | Macro | N (g/Kg) | 15,2 | 21,5 | 17,5 | 14 |
| P (g/Kg) | 0,9 | 0,9 | 0,6 | 0,3 |
| K (g/Kg) | 2,4 | 2,2 | 2,2 | 0,5 |
| Micro | Mg (g/Kg) | 2,8 | 3,3 | 3,4 | 1,6 |
| Ca (g/Kg) | 14,8 | 22,6 | 14,1 | 6,1 |
| S (g/Kg) | 2,1 | 1,7 | 1,3 | 1 |

**Table S5** Emergence data of individuals in the direct seeding technique.

|  | Treatment | Emerging individuals/sampling time | | | | % of emerging individuals | Total number of emerging individuals |
| --- | --- | --- | --- | --- | --- | --- | --- |
| **90 days** | **180 days** | **270 days** | **360 days** |
| PNMGD | *A. urundeuva* | 3 | 0 | 0 | 0 | 3 | 151 |
| *E. uniflora* | 20 | 20 | 12 | 4 | 56 |
| *H. courbaril* | 16 | 5 | 0 | 0 | 21 |
| Mix *– A. urundeuva* | 2 | 0 | 0 | 0 | 2 |
| Mix *– E. uniflora* | 16 | 22 | 3 | 1 | 42 |
| Mix *– H. courbaril* | 21 | 5 | 1 | 0 | 27 |
| FAECA | *A. urundeuva* | 0 | 0 | 0 | 0 | 0 | 65 |
| *E. uniflora* | 5 | 8 | 2 | 0 | 15 |
| *H. courbaril* | 3 | 4 | 0 | 0 | 7 |
| Mix *– A. urundeuva* | 0 | 0 | 0 | 0 | 0 |
| Mix *– E. uniflora* | 10 | 11 | 0 | 0 | 21 |
| Mix *– H. courbaril* | 10 | 11 | 0 | 1 | 22 |
